# Supplementary material for: Exergetic life cycle analysis for the selection of chromatographic separation processes in the pharmaceutical industry: preparative HPLC versus preparative SFC
Source: Royal Society of Chemistry journal article supplement (doi:10.1039/b901151j), 2009-01-01
Supplement: b901151j.pdf [file b901151j.pdf]

## **Electronic Supplementary Information**

### **Exergetic life cycle analysis for the selection of chromatographic separation processes in the pharmaceutical industry: Preparative HPLC versus Preparative SFC.**

#### **Authors:**

Geert Van der Vorst <sup>a</sup>, Herman Van Langenhove <sup>a</sup>, Frederik De Paep <sup>a</sup>, Wim Aelterman <sup>b</sup>, Jules Dingenen <sup>b</sup>, Jo Dewulf <sup>a</sup>

<sup>a</sup> Research Group ENVOC, Ghent University, Coupure Links 653, Ghent, B-9000, Belgium.

<sup>b</sup> Johnson & Johnson PRD, Janssen Pharmaceutica nv, Turnhoutseweg 30, Beerse, 2340, Belgium

Corresponding author:

Prof. J. Dewulf

Research Group ENVOC

Ghent University

Coupure Links 653,

B-9000 Ghent, Belgium

Tel: ++32 9 264 59 49

Fax: ++32 9 264 62 43

E-mail: [jo.dewulf@ugent.be](mailto:jo.dewulf@ugent.be)

## Figures:

Figure S1: P&ID of the Prep-HPLC separation in the  $\alpha$  system boundary (energy streams are not shown to reduce complexity)

Figure S2: P&ID of the Prep-SFC separation in the  $\alpha$  system boundary (energy streams are not shown to reduce complexity)

## Tables:

Table S1: Mass and energy balance in the  $\alpha$  system boundary for the Prep-HPLC separation of 500 g racemic mixture. This table is linked with the annotations in Fig. S1

Tabel S2: Mass and energy balance in the  $\alpha$  system boundary for the Prep-SFC separation of 500 g racemic mixture. This table is linked with the annotations in Fig. S2

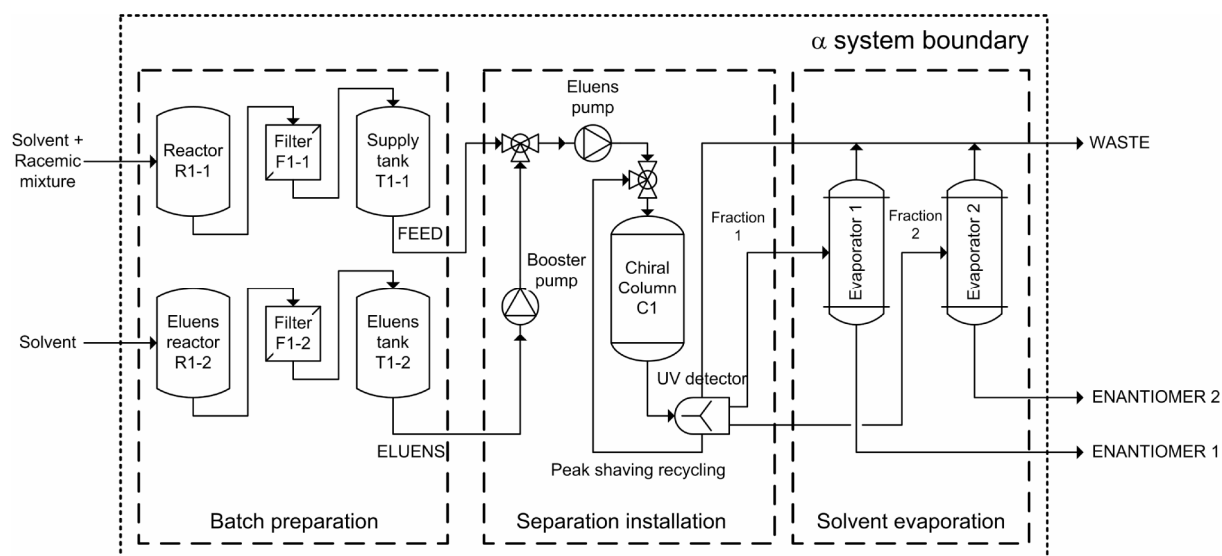

**Figure S1: P&ID of the Prep-HPLC separation in the  $\alpha$  system boundary (energy streams are not shown to reduce complexity)**

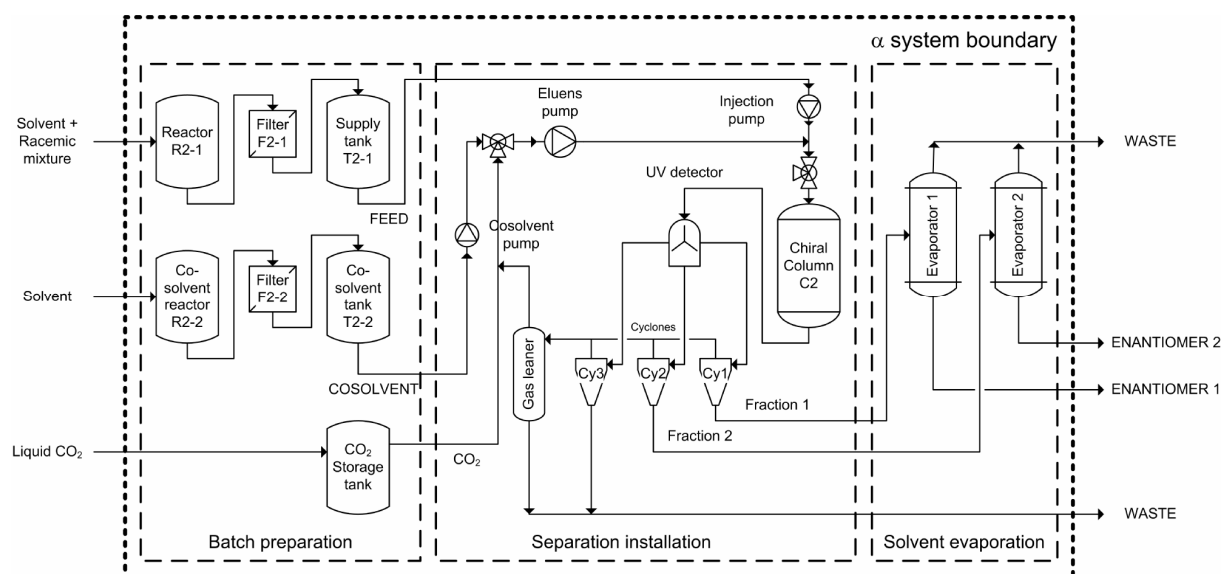

**Figure S2: P&ID of the Prep-SFC separation in the  $\alpha$  system boundary (energy streams are not shown to reduce complexity)**

**Table S1: Mass and energy balance in the  $\alpha$  system boundary for the Prep-HPLC separation of 500 g racemic mixture. This table is linked with the annotations in Fig. S1**

| Equipment                             | INPUT                                                                                 |                                                                                                                                                                                                             | OUTPUT                        |                                                      |
|---------------------------------------|---------------------------------------------------------------------------------------|-------------------------------------------------------------------------------------------------------------------------------------------------------------------------------------------------------------|-------------------------------|------------------------------------------------------|
| BASIC OPERATIONS                      |                                                                                       |                                                                                                                                                                                                             |                               |                                                      |
| <b>Reactor R1-1</b>                   |                                                                                       |                                                                                                                                                                                                             |                               |                                                      |
| Inerting                              | 68.75 kJ<br>0.20 kg                                                                   | Electricity for setting vacuum<br>N <sub>2</sub> gas at 8 bar                                                                                                                                               |                               |                                                      |
| Pumping in solvents + racemic mixture | 57.29 kJ<br>0.50 kg<br>26.03 kg<br>63.69 kg<br>0.07 kg                                | Electricity for pumping solvents<br>Racemic mixture<br>Methanol<br>Ethanol<br>N <sub>2</sub> gas at 8 bar                                                                                                   | 0.20 kg                       | N <sub>2</sub>                                       |
| Stirring                              | 511.50 kJ                                                                             | Electricity for stirring                                                                                                                                                                                    |                               |                                                      |
| Emptying reactor                      | 0.00 kJ                                                                               | Gravimetrically                                                                                                                                                                                             | 90.22 kg<br>0.07 kg           | Solvents + racemic mixture to F1-1<br>N <sub>2</sub> |
| Cleaning reactor                      | 1.67 kg<br>1.23 kg<br>10.66 kJ<br>495.00 kJ<br>747.48 kJ<br>190.12 kJ<br>747.48 kJ    | Water<br>Methanol<br>Electricity for pumping solvents<br>Electricity for stirring<br>Heat from shellsol (175°C, 6 bar)<br>Electricity for pumping heating medium<br>Cooling with cold shellsol (4°C, 6 bar) | 1.67 kg<br>1.23 kg            | Water<br>Methanol                                    |
| <b>Filter F1-1</b>                    |                                                                                       |                                                                                                                                                                                                             |                               |                                                      |
| Inerting                              | 495.00 kJ<br>0.34 kg                                                                  | Electricity for setting vacuum<br>N <sub>2</sub> gas at 8 bar                                                                                                                                               |                               |                                                      |
| Pumping in mixture                    | 90.22 kg                                                                              | Solvents + racemic mixture from R1-1                                                                                                                                                                        | 0.13 kg                       | N <sub>2</sub>                                       |
| Filtration under pressure             | 0.63 kg                                                                               | N <sub>2</sub> gas at 8 bar                                                                                                                                                                                 | 90.22 kg                      | Solvent + racemic mixture to T1-1                    |
| Emptying filter                       | 0.00 kJ                                                                               | Manually                                                                                                                                                                                                    | 0.85 kg                       | N <sub>2</sub>                                       |
| Cleaning filter                       | 4.00 kg<br>3.95 kg<br>29.70 kJ<br>1350.00 kJ<br>4755.62 kJ<br>675.00 kJ<br>4755.62 kJ | Water<br>Methanol<br>Electricity for pumping solvents<br>Electricity for stirring<br>Heat from shellsol (175°C, 6 bar)<br>Electricity for pumping heating medium<br>Cooling with cold shellsol (4°C, 6 bar) | 4.00 kg<br>3.95 kg            | Water<br>Methanol                                    |
| <b>Supply tank T1-1</b>               |                                                                                       |                                                                                                                                                                                                             |                               |                                                      |
| Inerting                              | 68.75 kJ<br>0.20 kg                                                                   | Electricity for setting vacuum<br>N <sub>2</sub> gas at 8 bar                                                                                                                                               |                               |                                                      |
| Pumping in mixture                    | 90.22 kg                                                                              | Filtered solvents + racemic mixture from F1-1                                                                                                                                                               | 0.13 kg                       | N <sub>2</sub>                                       |
| Emptying tank                         | 0.00 kJ                                                                               | Gravimetrically                                                                                                                                                                                             | 90.22 kg<br>0.07 kg           | Solvents + racemic mixture to C1<br>N <sub>2</sub>   |
| Cleaning tank                         | 1.67 kg<br>0.99 kg<br>0.07 kg<br>28.65 kJ                                             | Water<br>Methanol<br>Acetone<br>Electricity for pumping solvents                                                                                                                                            | 1.67 kg<br>0.99 kg<br>0.07 kg | Water<br>Methanol<br>Acetone                         |
| <b>Eluens reactor R1-2</b>            |                                                                                       |                                                                                                                                                                                                             |                               |                                                      |
| Inerting                              | 330.00 kJ<br>0.97 kg                                                                  | Electricity for setting vacuum<br>N <sub>2</sub> gas at 8 bar                                                                                                                                               |                               |                                                      |
| Pumping in solvents                   | 419.63 kg<br>33.69 kg<br>0.20 kg<br>0.13 kg<br>275.00 kJ<br>0.32 kg                   | Methanol<br>Acetonitrile<br>Trifluoroacetic acid<br>Water<br>Electricity for pumping solvents<br>N <sub>2</sub> gas at 8 bar                                                                                | 0.97 kg                       | N <sub>2</sub>                                       |
| Stirring                              | 5160.00 kJ                                                                            | Electricity for stirring                                                                                                                                                                                    |                               |                                                      |
| Emptying reactor                      | 0.00 kJ                                                                               | Gravimetrically                                                                                                                                                                                             | 453.64 kg<br>0.32 kg          | Solvents to F1-2<br>N <sub>2</sub>                   |
| Cleaning reactor                      | 8.00 kg<br>5.93 kg<br>51.15 kJ<br>1620.00 kJ<br>3587.91 kJ<br>402.30 kJ<br>3587.91 kJ | Water<br>Methanol<br>Electricity for pumping solvents<br>Electricity for stirring<br>Heat from shellsol (175°C, 6 bar)<br>Electricity for pumping heating medium<br>Cooling with cold shellsol (4°C, 6 bar) | 8.00 kg<br>5.93 kg            | Water<br>Methanol                                    |

**Filter F1-2**

|                           |            |                                         |           |                 |
|---------------------------|------------|-----------------------------------------|-----------|-----------------|
| Inerting                  | 990.00 kJ  | Electricity for setting vacuum          |           |                 |
|                           | 0.69 kg    | N <sub>2</sub> gas at 8 bar             |           |                 |
| Pumping in mixture        | 453.64 kg  | Solvents from R1-2                      | 0.66 kg   | N <sub>2</sub>  |
| Filtration under pressure | 1.67 kg    | N <sub>2</sub> gas at 8 bar             | 453.64 kg | Solvent to T1-2 |
| Emptying filter           | 0.00 kJ    | Manually                                | 1.70 kg   | N <sub>2</sub>  |
| Cleaning filter           | 8.00 kg    | Water                                   | 8.00 kg   | Water           |
|                           | 7.90 kg    | Methanol                                | 7.90 kg   | Methanol        |
|                           | 59.40 kJ   | Electricity for pumping solvents        |           |                 |
|                           | 2700.00 kJ | Electricity for stirring                |           |                 |
|                           | 9511.24 kJ | Heat from shellsol (175°C, 6 bar)       |           |                 |
|                           | 1350.00 kJ | Electricity for pumping heating medium  |           |                 |
|                           | 9511.24 kJ | Cooling with cold shellsol (4°C, 6 bar) |           |                 |

**Eluens tank T1-2**

|                    |           |                                  |           |                |
|--------------------|-----------|----------------------------------|-----------|----------------|
| Inerting           | 330.00 kJ | Electricity for setting vacuum   |           |                |
|                    | 0.97 kg   | N <sub>2</sub> gas at 8 bar      |           |                |
| Pumping in mixture | 453.64 kg | Filtered solvents F1-2           | 0.66 kg   | N <sub>2</sub> |
| Emptying tank      | 0.00 kJ   | Gravimetrically                  | 453.64 kg | Eluens to C1   |
|                    |           |                                  | 0.32 kg   | N <sub>2</sub> |
| Cleaning tank      | 8.00 kg   | Water                            | 8.00 kg   | Water          |
|                    | 4.74 kg   | Methanol                         | 4.74 kg   | Methanol       |
|                    | 0.32 kg   | Acetone                          | 0.32 kg   | Acetone        |
|                    | 137.52 kJ | Electricity for pumping solvents |           |                |

**Column C1**

|              |                  |                                   |                   |                    |
|--------------|------------------|-----------------------------------|-------------------|--------------------|
| Conditioning | 9900.00 kJ       | Electricity for pumping           |                   |                    |
|              | 8532.00 kJ       | Heating with steam (175°C, 9 bar) |                   |                    |
| Separation   | 1392405.06 kJ    | Electricity for pumping           | 47.51 kg          | Waste fraction     |
|              | 543.86 kg        | Solution                          | of which 0.05 kg  | racemic mixture    |
|              | of which 0.50 kg | racemic mixture                   | and 47.46 kg      | solvent mixture    |
|              | and 543.36 kg    | solvent mixture                   | 198.75 kg         | Fraction 1 to E1-1 |
|              | 1200000.00 kJ    | Heating with steam (175°C, 9 bar) | of which 0.225 kg | enantiomer 1       |
|              |                  |                                   | and 198.52 kg     | solvent mixture    |
|              |                  |                                   | 297.61 kg         | Fraction 2 to E1-2 |
|              |                  |                                   | of which 0.225 kg | enantiomer 1       |
|              |                  |                                   | and 297.39 kg     | solvent mixture    |
| Cleaning     | 9900.00 kJ       | Electricity for pumping           | 67.10 kg          | Ethanol            |
|              | 67.10 kg         | Ethanol                           |                   |                    |
|              | 8532.00 kJ       | Heating with steam (175°C, 9 bar) |                   |                    |

**Evaporator E1-1**

|                                |                  |                                    |           |                            |
|--------------------------------|------------------|------------------------------------|-----------|----------------------------|
| Inerting                       | 67.50 kJ         | Electricity for setting vacuum     |           |                            |
|                                | 0.01 kg          | N <sub>2</sub> gas at 8 bar        |           |                            |
| Inserting fraction 1           | 198.75 kg        | Fraction 1                         | 0.01 kg   | N <sub>2</sub>             |
|                                | of which 0.23 kg | enantiomer 1                       |           |                            |
|                                | and 198.52 kg    | solvent mixture                    |           |                            |
| Heating up from 30 °C to 55 °C | 220679.46 kJ     | Heat from warm water (60°C)        |           |                            |
|                                | 5575.32 kJ       | Electricity for pumping warm water |           |                            |
| Creating vacuüm                | 316.46 kJ        | Electricity for pumping            | 198.52 kg | Solvent mixture            |
|                                | 220679.46 kJ     | Cooling with cooling water (4°C)   |           |                            |
| Scraping                       | 13924.05 kJ      | Electricity for the scraper        |           |                            |
| Emptying evaporator            | 0.00 kJ          | Manually                           | 0.225 kg  | Enantiomer 1               |
| Cleaning evaporator            | 0.90 kg          | Ethylacetate                       | 0.90 kg   | Ethylacetate               |
|                                | 1.99 kg          | Dichloromethane / methanol         | 1.99 kg   | Dichloromethane / methanol |
|                                | 0.79 kg          | Ethanol                            | 0.79 kg   | Ethanol                    |
|                                | 2591.45 kJ       | Heat from warm water (60°C)        |           |                            |
|                                | 103.18 kJ        | Electricity for pumping warm water |           |                            |
|                                | 206.35 kJ        | Electricity for the scraper        |           |                            |
|                                | 2591.45 kJ       | Cooling with cooling water (4°C)   |           |                            |

**Evaporator E2-2**

|                                |                  |                                    |           |                            |
|--------------------------------|------------------|------------------------------------|-----------|----------------------------|
| Inerting                       | 67.50 kJ         | Electricity for setting vacuum     |           |                            |
|                                | 0.01 kg          | N <sub>2</sub> gas at 8 bar        |           |                            |
| Inserting fraction 2           | 297.61 kg        | Fraction 2                         | 0.01 kg   | N <sub>2</sub>             |
|                                | of which 0.23 kg | enantiomer 2                       |           |                            |
|                                | and 297.39 kg    | solvent mixture                    |           |                            |
| Heating up from 30 °C to 55 °C | 330572.69 kJ     | Heat from warm water (60°C)        |           |                            |
|                                | 8348.73 kJ       | Electricity for pumping warm water |           |                            |
| Creating vacuüm                | 316.46 kJ        | Electricity for pumping            | 297.39 kg | Solvent mixture            |
|                                | 330572.69 kJ     | Cooling with cooling water (4°C)   |           |                            |
| Scraping                       | 13924.05 kJ      | Electricity for the scraper        |           |                            |
| Emptying evaporator            | 0.00 kJ          | Manually                           | 0.225 kg  | Enantiomer 2               |
| Cleaning evaporator            | 0.90 kg          | Ethylacetate                       | 0.90 kg   | Ethylacetate               |
|                                | 1.99 kg          | Dichloromethane / methanol         | 1.99 kg   | Dichloromethane / methanol |
|                                | 0.79 kg          | Ethanol                            | 0.79 kg   | Ethanol                    |
|                                | 2591.45 kJ       | Heat from warm water (60°C)        |           |                            |
|                                | 103.18 kJ        | Electricity for pumping warm water |           |                            |
|                                | 206.35 kJ        | Electricity for the scraper        |           |                            |
|                                | 2591.45 kJ       | Cooling with cooling water (4°C)   |           |                            |

**Tabel S2: Mass and energy balance in the  $\alpha$  system boundary for the Prep-SFC separation of 500 g racemic mixture. This table is linked with the annotations in Fig. S2**

| <b>Equipment</b>                      | <b>INPUT</b>                                                                          |                                                                                                                                                                                                             | <b>OUTPUT</b>                 |                                                      |
|---------------------------------------|---------------------------------------------------------------------------------------|-------------------------------------------------------------------------------------------------------------------------------------------------------------------------------------------------------------|-------------------------------|------------------------------------------------------|
| <b>BASIC OPERATIONS</b>               |                                                                                       |                                                                                                                                                                                                             |                               |                                                      |
| <b>Reactor R2-1</b>                   |                                                                                       |                                                                                                                                                                                                             |                               |                                                      |
| Inerting                              | 68.75 kJ<br>0.20 kg                                                                   | Electricity for setting vacuum<br>N <sub>2</sub> gas at 8 bar                                                                                                                                               |                               |                                                      |
| Pumping in solvents + racemic mixture | 57.29 kJ<br>0.50 kg<br>4.58 kg<br>11.21 kg<br>0.18 kg                                 | Electricity for pumping solvents<br>Racemic mixture<br>Methanol<br>Ethanol<br>N <sub>2</sub> gas at 8 bar                                                                                                   | 0.20 kg                       | N <sub>2</sub>                                       |
| Stirring                              | 90.00 kJ                                                                              | Electricity for stirring                                                                                                                                                                                    |                               |                                                      |
| Emptying reactor                      | 0.00 kJ                                                                               | Gravimetrically                                                                                                                                                                                             | 16.29 kg<br>0.18 kg           | Solvents + racemic mixture to F2-1<br>N <sub>2</sub> |
| Cleaning reactor                      | 1.67 kg<br>1.23 kg<br>10.66 kJ<br>495.00 kJ<br>747.48 kJ<br>190.12 kJ<br>747.48 kJ    | Water<br>Methanol<br>Electricity for pumping solvents<br>Electricity for stirring<br>Heat from shellsol (175°C, 6 bar)<br>Electricity for pumping heating medium<br>Cooling with cold shellsol (4°C, 6 bar) | 1.67 kg<br>1.23 kg            | Water<br>Methanol                                    |
| <b>Filter F2-1</b>                    |                                                                                       |                                                                                                                                                                                                             |                               |                                                      |
| Inerting                              | 495.00 kJ<br>0.34 kg                                                                  | Electricity for setting vacuum<br>N <sub>2</sub> gas at 8 bar                                                                                                                                               |                               |                                                      |
| Pumping in mixture                    | 16.29 kg                                                                              | Solvents + racemic mixture from R2-1                                                                                                                                                                        | 0.02 kg                       | N <sub>2</sub>                                       |
| Filtration under pressure             | 0.53 kg                                                                               | N <sub>2</sub> gas at 8 bar                                                                                                                                                                                 | 16.29 kg                      | Solvent + racemic mixture to T2-1                    |
| Emptying filter                       | 0.00 kJ                                                                               | Manually                                                                                                                                                                                                    | 0.85 kg                       | N <sub>2</sub>                                       |
| Cleaning filter                       | 4.00 kg<br>3.95 kg<br>29.70 kJ<br>1350.00 kJ<br>4755.62 kJ<br>675.00 kJ<br>4755.62 kJ | Water<br>Methanol<br>Electricity for pumping solvents<br>Electricity for stirring<br>Heat from shellsol (175°C, 6 bar)<br>Electricity for pumping heating medium<br>Cooling with cold shellsol (4°C, 6 bar) | 4.00 kg<br>3.95 kg            | Water<br>Methanol                                    |
| <b>Supply tank T2-1</b>               |                                                                                       |                                                                                                                                                                                                             |                               |                                                      |
| Inerting                              | 68.75 kJ<br>0.20 kg                                                                   | Electricity for setting vacuum<br>N <sub>2</sub> gas at 8 bar                                                                                                                                               |                               |                                                      |
| Pumping in mixture                    | 16.29 kg                                                                              | Filtered solvents + racemic mixture from F2-1                                                                                                                                                               | 0.02 kg                       | N <sub>2</sub>                                       |
| Emptying tank                         | 0.00 kJ                                                                               | Gravimetrically                                                                                                                                                                                             | 16.29 kg<br>0.18 kg           | Solvents + racemic mixture to C2<br>N <sub>2</sub>   |
| Cleaning tank                         | 1.67 kg<br>0.99 kg<br>0.07 kg<br>23.40 kJ                                             | Water<br>Methanol<br>Acetone<br>Electricity for pumping solvents                                                                                                                                            | 1.67 kg<br>0.99 kg<br>0.07 kg | Water<br>Methanol<br>Acetone                         |
| <b>Cosolvent reactor R2-2</b>         |                                                                                       |                                                                                                                                                                                                             |                               |                                                      |
| Inerting                              | 165.00 kJ<br>0.49 kg                                                                  | Electricity for setting vacuum<br>N <sub>2</sub> gas at 8 bar                                                                                                                                               |                               |                                                      |
| Pumping in solvents                   | 199.89 kg<br>137.50 kJ<br>0.20 kg                                                     | Ethanol<br>Electricity for pumping solvents<br>N <sub>2</sub> gas at 8 bar                                                                                                                                  | 0.49 kg                       | N <sub>2</sub>                                       |
| Stirring                              | 1140.00 kJ                                                                            | Electricity for stirring                                                                                                                                                                                    |                               |                                                      |
| Emptying reactor                      | 0.00 kJ                                                                               | Gravimetrically                                                                                                                                                                                             | 199.89 kg<br>0.20 kg          | Solvents to F2-2<br>N <sub>2</sub>                   |
| Cleaning reactor                      | 4.00 kg<br>2.96 kg<br>25.58 kJ<br>810.00 kJ<br>1793.96 kJ<br>201.15 kJ<br>1793.96 kJ  | Water<br>Methanol<br>Electricity for pumping solvents<br>Electricity for stirring<br>Heat from shellsol (175°C, 6 bar)<br>Electricity for pumping heating medium<br>Cooling with cold shellsol (4°C, 6 bar) | 4.00 kg<br>2.96 kg            | Water<br>Methanol                                    |

**Filter F2-2**

|                           |            |                                         |           |                 |
|---------------------------|------------|-----------------------------------------|-----------|-----------------|
| Inerting                  | 495.00 kJ  | Electricity for setting vacuum          |           |                 |
|                           | 0.34 kg    | N <sub>2</sub> gas at 8 bar             |           |                 |
| Pumping in mixture        | 199.89 kg  | Solvents from R2-2                      | 0.29 kg   | N <sub>2</sub>  |
| Filtration under pressure | 0.79 kg    | N <sub>2</sub> gas at 8 bar             | 199.89 kg | Solvent to T2-2 |
| Emptying filter           | 0.00 kJ    | Manually                                | 0.85 kg   | N <sub>2</sub>  |
| Cleaning filter           | 4.00 kg    | Water                                   | 4.00 kg   | Water           |
|                           | 3.95 kg    | Methanol                                | 3.95 kg   | Methanol        |
|                           | 29.70 kJ   | Electricity for pumping solvents        |           |                 |
|                           | 1350.00 kJ | Electricity for stirring                |           |                 |
|                           | 4755.62 kJ | Heat from shellsol (175°C, 6 bar)       |           |                 |
|                           | 675.00 kJ  | Electricity for pumping heating medium  |           |                 |
|                           | 4755.62 kJ | Cooling with cold shellsol (4°C, 6 bar) |           |                 |

**Cosolvent tank T2-2**

|                    |           |                                  |           |                |
|--------------------|-----------|----------------------------------|-----------|----------------|
| Inerting           | 165.00 kJ | Electricity for setting vacuum   |           |                |
|                    | 0.49 kg   | N <sub>2</sub> gas at 8 bar      |           |                |
| Pumping in mixture | 199.89 kg | Filtered solvents F2-2           | 0.29 kg   | N <sub>2</sub> |
| Emptying tank      | 0.00 kJ   | Gravimetrically                  | 199.89 kg | Eluents to C2  |
| Cleaning tank      | 4.00 kg   | Water                            | 4.00 kg   | Water          |
|                    | 2.37 kg   | Methanol                         | 2.37 kg   | Methanol       |
|                    | 0.16 kg   | Acetone                          | 0.16 kg   | Acetone        |
|                    | 65.46 kJ  | Electricity for pumping solvents |           |                |

**Column C2**

|              |                  |                                  |                   |                         |
|--------------|------------------|----------------------------------|-------------------|-------------------------|
| Conditioning | 19962.00 kJ      | Electricity for pumping          |                   |                         |
|              | 34200.00 kJ      | Electricity for heating          |                   |                         |
|              | 25200.00 kJ      | Electricity for cooling          |                   |                         |
| Separation   | 1651575.00 kJ    | Electricity for pumping          | 100.40 kg         | Waste fraction          |
|              | 216.19 kg        | Solution + modifier              | of which 0.03 kg  | racemic mixture         |
|              | of which 0.50 kg | racemic mixture                  | and 100.38 kg     | solvent mixture         |
|              | and 215.69 kg    | organic solvent                  | 44.27 kg          | Fraction 1              |
|              | 950.00 kg        | CO <sub>2</sub> (60 bar, liquid) | of which 0.225 kg | enantiomer 1            |
|              | 2850000.00 kJ    | Electricity for heating          | and 44.04 kg      | solvent mixture         |
|              | 2100000.00 kJ    | Electricity for cooling          | 69.34 kg          | Fraction 2              |
|              |                  |                                  | of which 0.225 kg | enantiomer 1            |
| Cleaning     | 19800.00 kJ      | Electricity for pumping          | 9.60 kg           | Ethanol                 |
|              | 9.60 kg          | Ethanol                          | 9.60 kg           | CO <sub>2</sub> (1 atm) |
|              | 9.60 kg          | CO <sub>2</sub> (60 bar, liquid) |                   |                         |
|              | 34200.00 kJ      | Electricity for heating          |                   |                         |
|              | 25200.00 kJ      | Electricity for cooling          |                   |                         |
|              |                  |                                  |                   |                         |

**Evaporator E2-1**

|                                |                  |                                    |          |                            |
|--------------------------------|------------------|------------------------------------|----------|----------------------------|
| Inerting                       | 67.50 kJ         | Electricity for setting vacuum     |          |                            |
|                                | 0.01 kg          | N <sub>2</sub> gas at 8 bar        |          |                            |
| Inserting fraction 1           | 44.27 kg         | Fraction 1                         | 0.01 kg  | N <sub>2</sub>             |
|                                | of which 0.23 kg | enantiomer 1                       |          |                            |
|                                | and 44.04 kg     | solvent mixture                    |          |                            |
| Heating up from 30 °C to 55 °C | 39810.54 kJ      | Heat from warm water (60°C)        |          |                            |
|                                | 3214.77 kJ       | Electricity for pumping warm water |          |                            |
| Creating vacuüm                | 187.50 kJ        | Electricity for setting vacuum     | 44.04 kg | Solvent mixture            |
|                                | 39810.54 kJ      | Cooling with cooling water (4°C)   |          |                            |
| Scraping                       | 8250.00 kJ       | Electricity for the scraper        |          |                            |
| Emptying evaporator            | 0.00 kJ          | Manually                           | 0.225 kg | Enantiomer 1               |
| Cleaning evaporator            | 0.90 kg          | Ethylacetate                       | 0.90 kg  | Ethylacetate               |
|                                | 1.99 kg          | Dichloromethane / methanol         | 1.99 kg  | Dichloromethane / methanol |
|                                | 0.79 kg          | Ethanol                            | 0.79 kg  | Ethanol                    |
|                                | 2591.45 kJ       | Heat from warm water (60°C)        |          |                            |
|                                | 103.18 kJ        | Electricity for pumping warm water |          |                            |
|                                | 206.35 kJ        | Electricity for the scraper        |          |                            |
|                                | 2591.45 kJ       | Cooling with cooling water (4°C)   |          |                            |

**Evaporator E2-2**

|                                |                  |                                    |          |                            |
|--------------------------------|------------------|------------------------------------|----------|----------------------------|
| Inerting                       | 67.50 kJ         | Electricity for setting vacuum     |          |                            |
|                                | 0.01 kg          | N <sub>2</sub> gas at 8 bar        |          |                            |
| Inserting fraction 2           | 69.34 kg         | Fraction 2                         | 0.01 kg  | N <sub>2</sub>             |
|                                | of which 0.23 kg | enantiomer 2                       |          |                            |
|                                | and 69.11 kg     | solvent mixture                    |          |                            |
| Heating up from 30 °C to 55 °C | 62461.92 kJ      | Heat from warm water (60°C)        |          |                            |
|                                | 5035.23 kJ       | Electricity for pumping warm water |          |                            |
| Creating vacuüm                | 187.50 kJ        | Electricity for pumping            | 69.11 kg | Solvent mixture            |
|                                | 62461.92 kJ      | Cooling with cooling water (4°C)   |          |                            |
| Scraping                       | 8250.00 kJ       | Electricity for the scraper        |          |                            |
| Emptying evaporator            | 0.00 kJ          | Manually                           | 0.225 kg | Enantiomer 2               |
| Cleaning evaporator            | 0.90 kg          | Ethylacetate                       | 0.90 kg  | Ethylacetate               |
|                                | 1.99 kg          | Dichloromethane / methanol         | 1.99 kg  | Dichloromethane / methanol |
|                                | 0.79 kg          | Ethanol                            | 0.79 kg  | Ethanol                    |
|                                | 2591.45 kJ       | Heat from warm water (60°C)        |          |                            |
|                                | 103.18 kJ        | Electricity for pumping warm water |          |                            |
|                                | 206.35 kJ        | Electricity for the scraper        |          |                            |
|                                | 2591.45 kJ       | Cooling with cooling water (4°C)   |          |                            |
